# Supplementary material for: Denoising the Denoisers: an independent evaluation of microbiome sequence error-correction approaches
Source: PubMed Central journal article supplement (PMC6087418; doi:10.7717/peerj.5364), 2018-08-08
Supplement: peerj-06-5364-s005.pdf [file peerj-06-5364-s005.pdf]

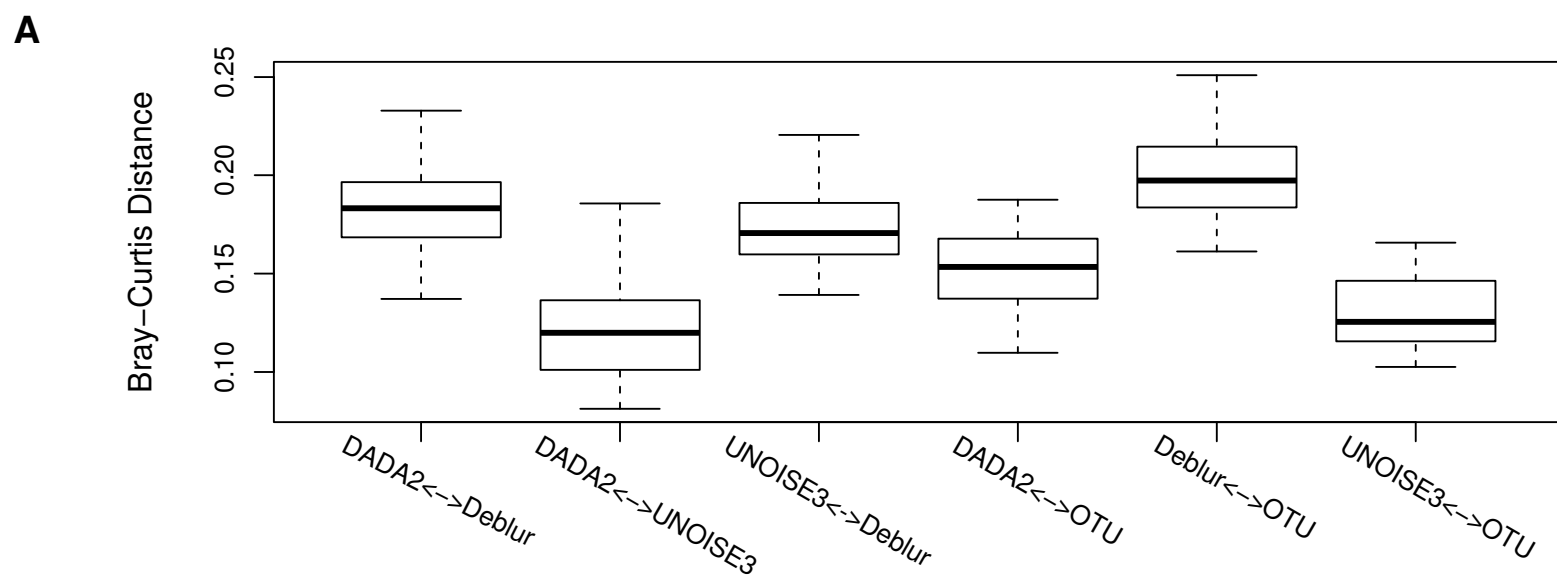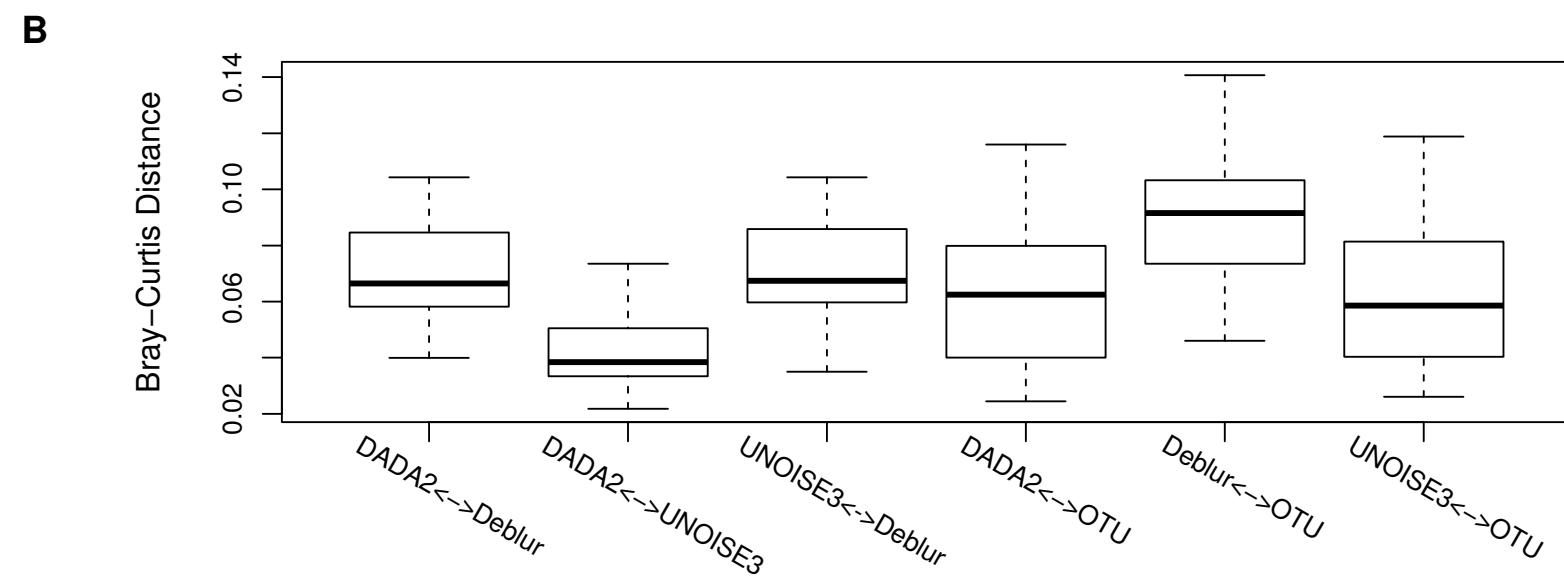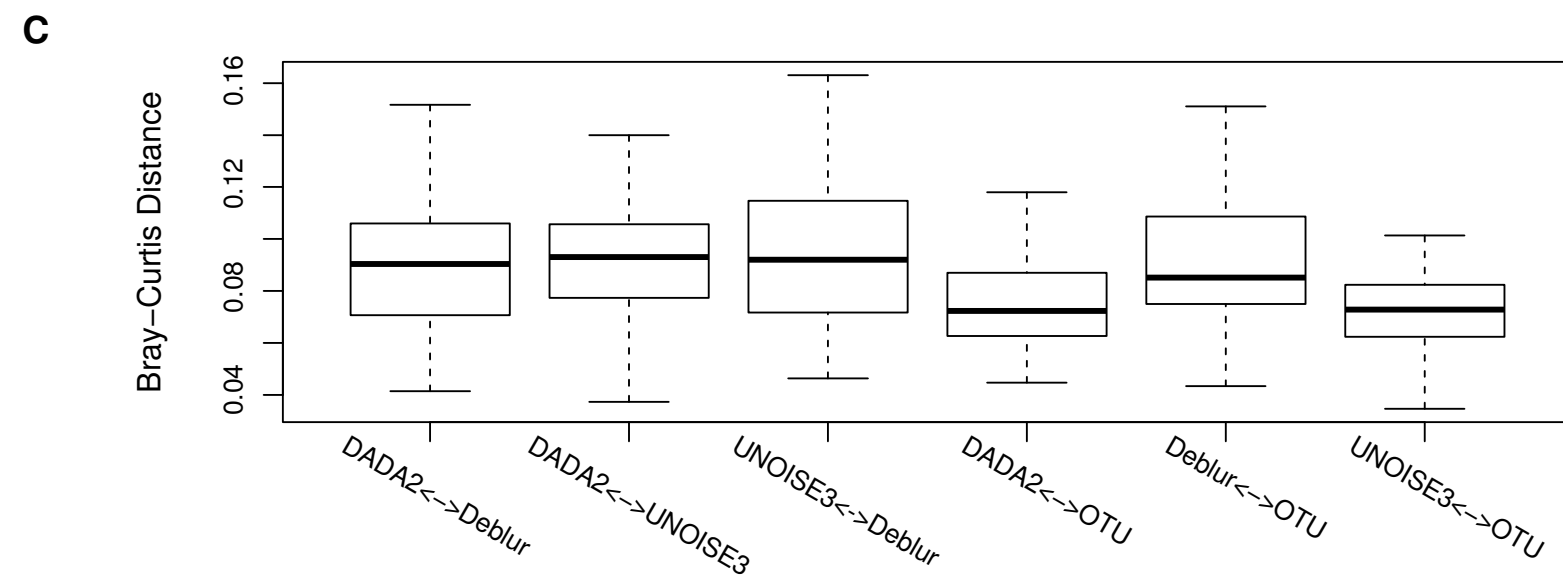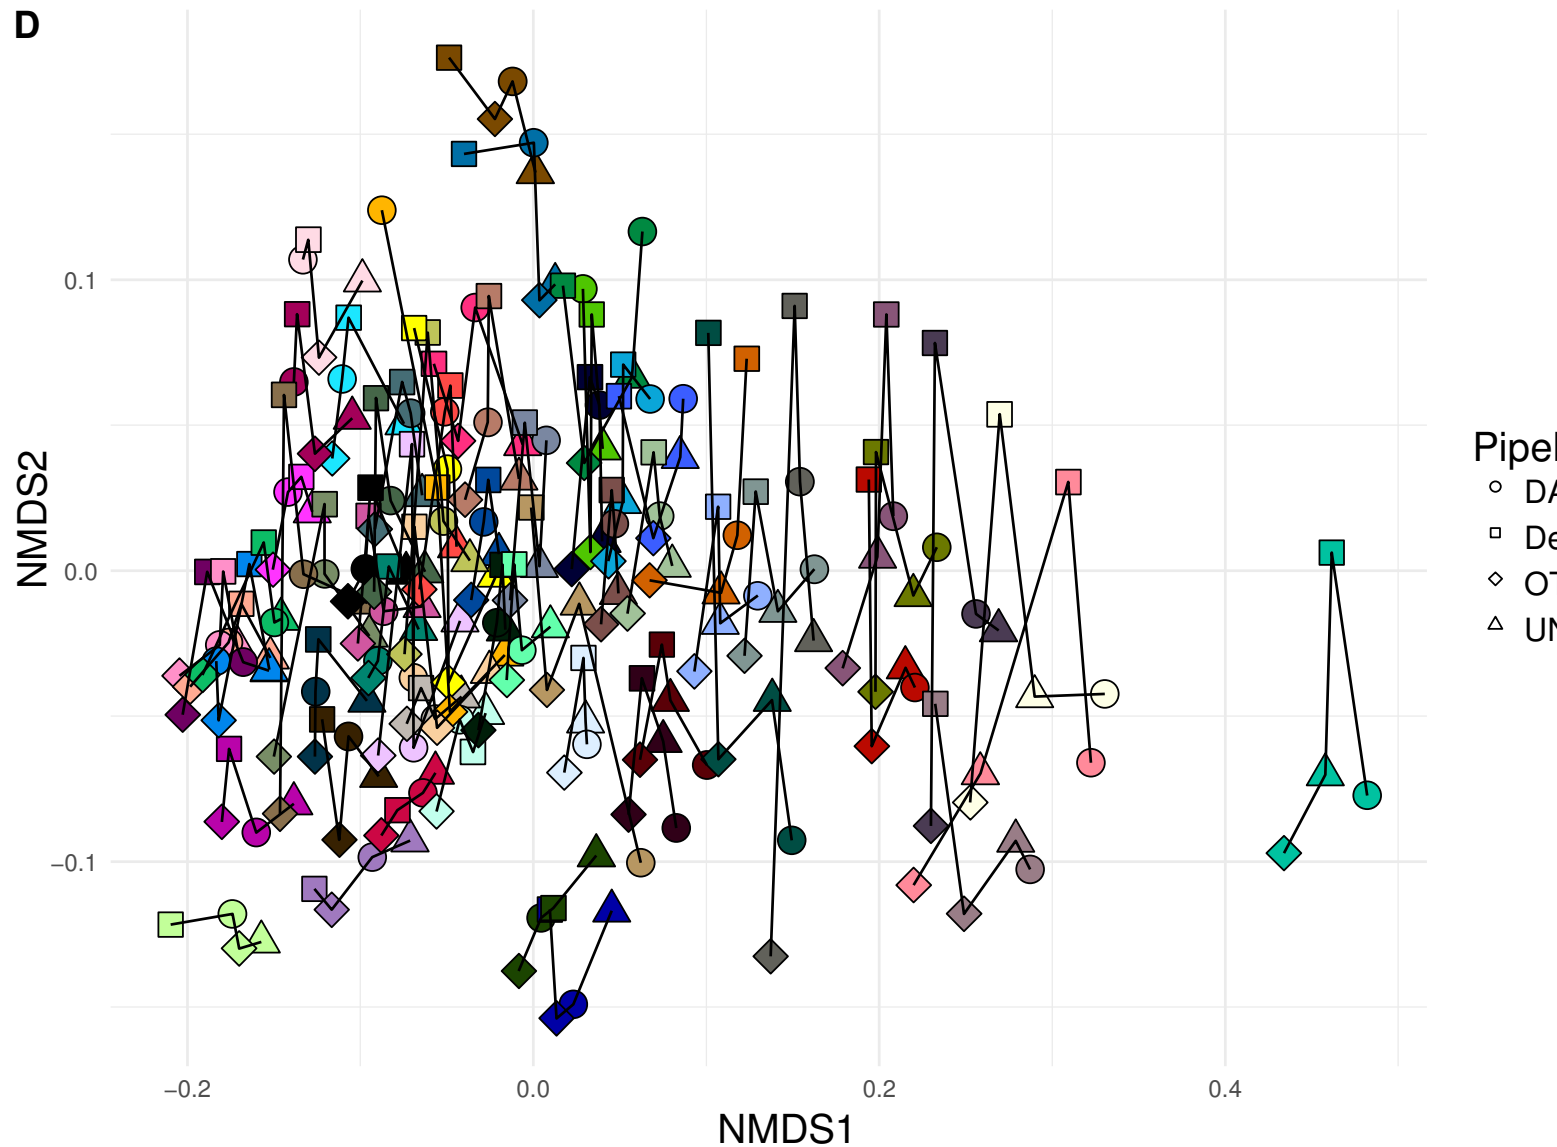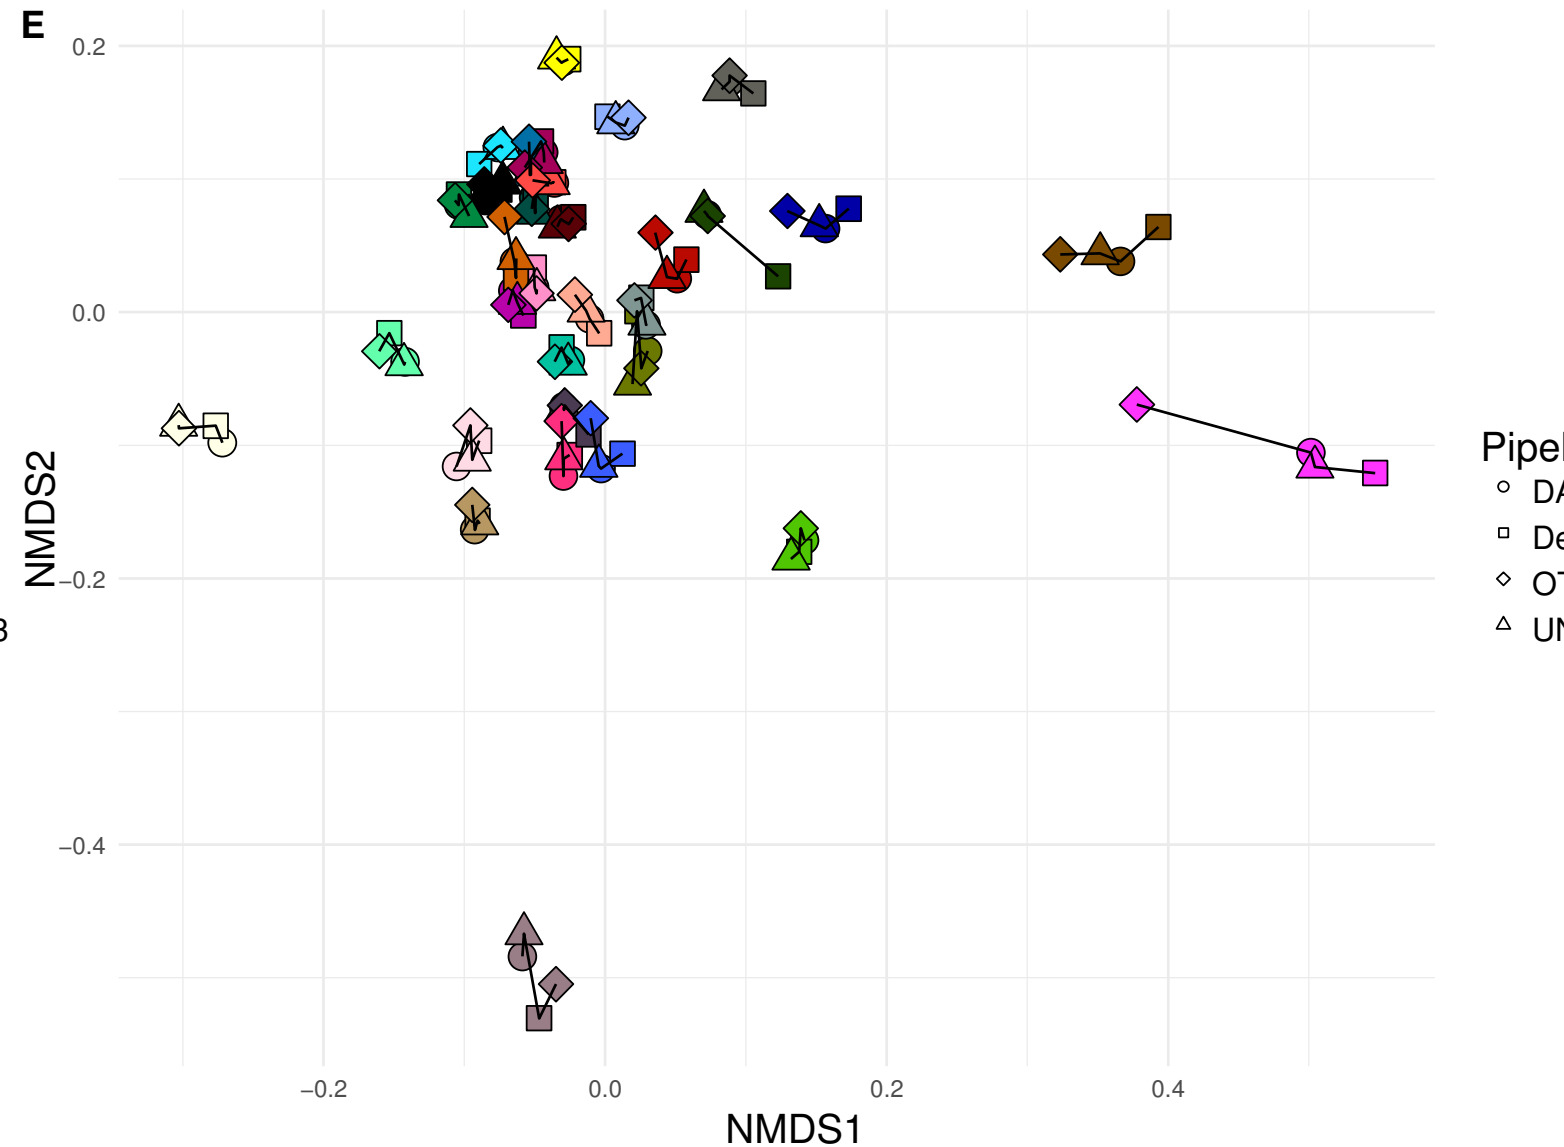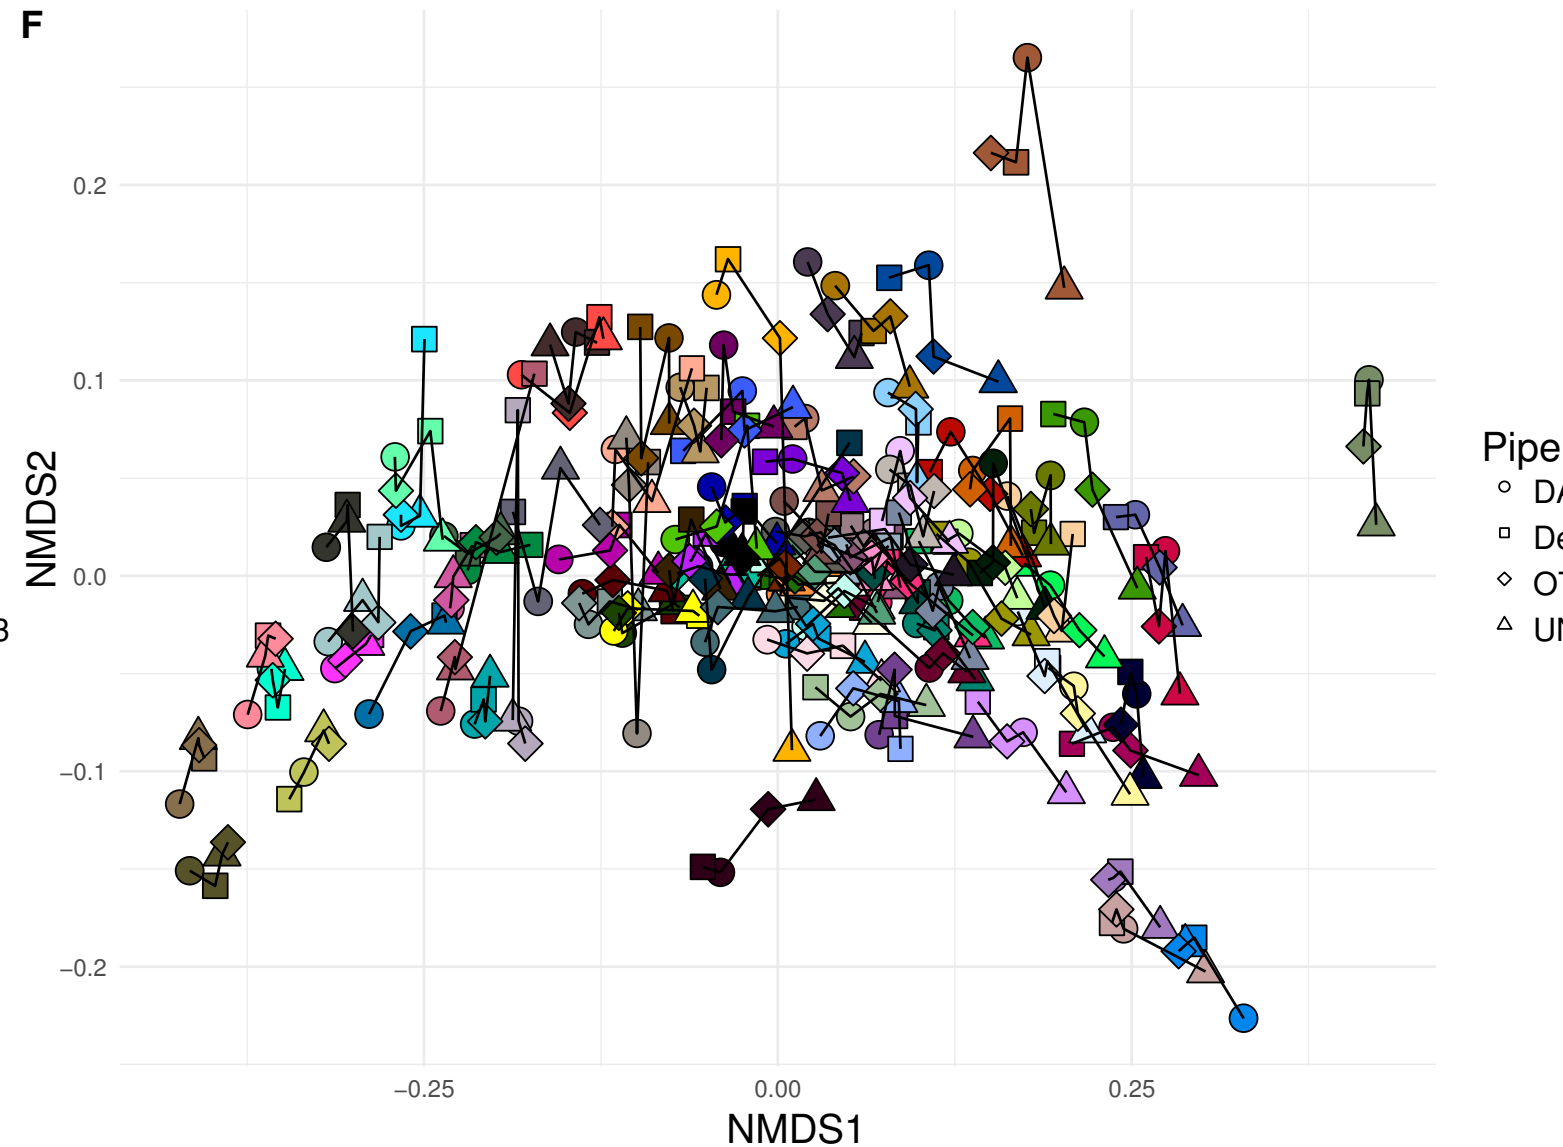

Supplemental Figure 5: Bray-Curtis dissimilarity intra-sample distances between sequencing processing methods based on three real datasets reveals relatively similar biological profiles.

A-C) The Bray-Curtis dissimilarity distances between the same biological samples based on ASVs/OTUs outputted by each of the different sequence processing methods on the soil, human associated, and Exercise datasets respectively. D-F) Non-metric multidimensional scaling plots of all the samples in the soil, human associated, and Exercise datasets respectively. The four different sample profiles generated for each biological sample are colour-coded and are joined by an interconnecting line.
