# Supplementary material for: Denoising the Denoisers: an independent evaluation of microbiome sequence error-correction approaches
Source: PubMed Central journal article supplement (PMC6087418; doi:10.7717/peerj.5364), 2018-08-08
Supplement: peerj-06-5364-s007.pdf [file peerj-06-5364-s007.pdf]

**A**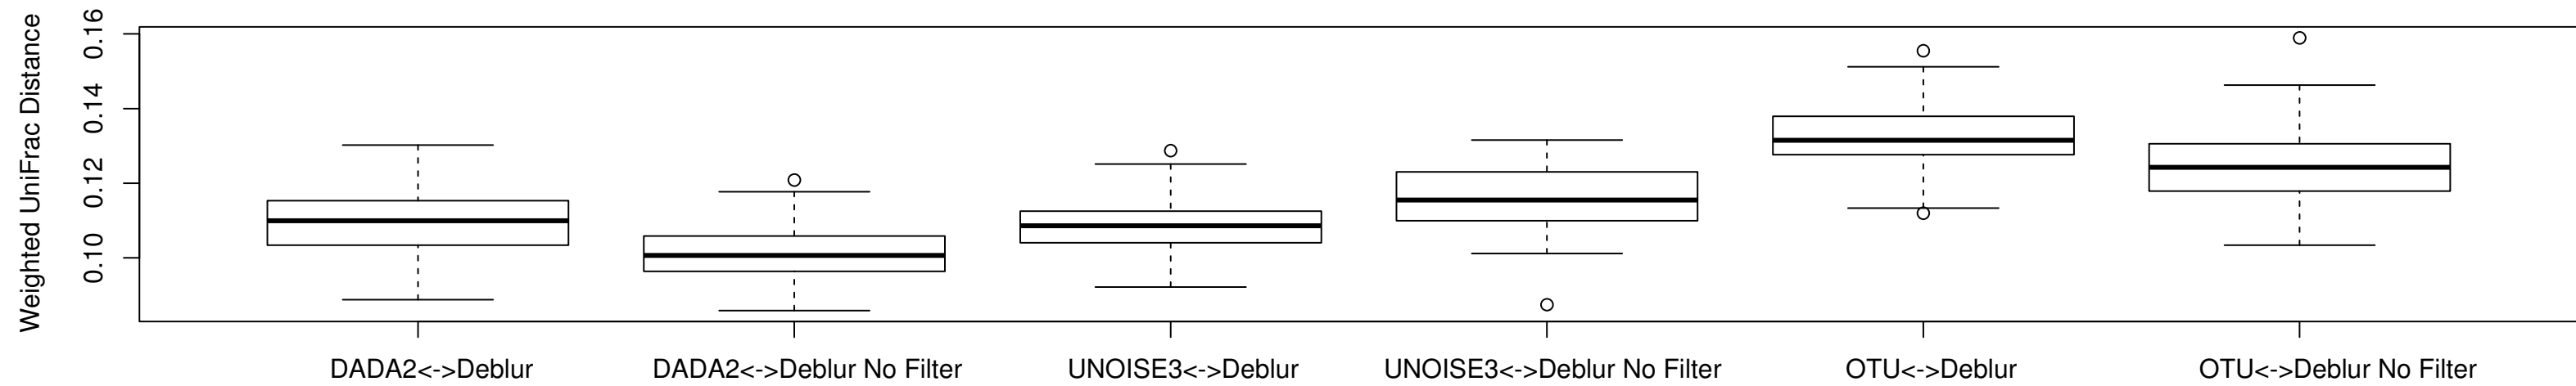**B**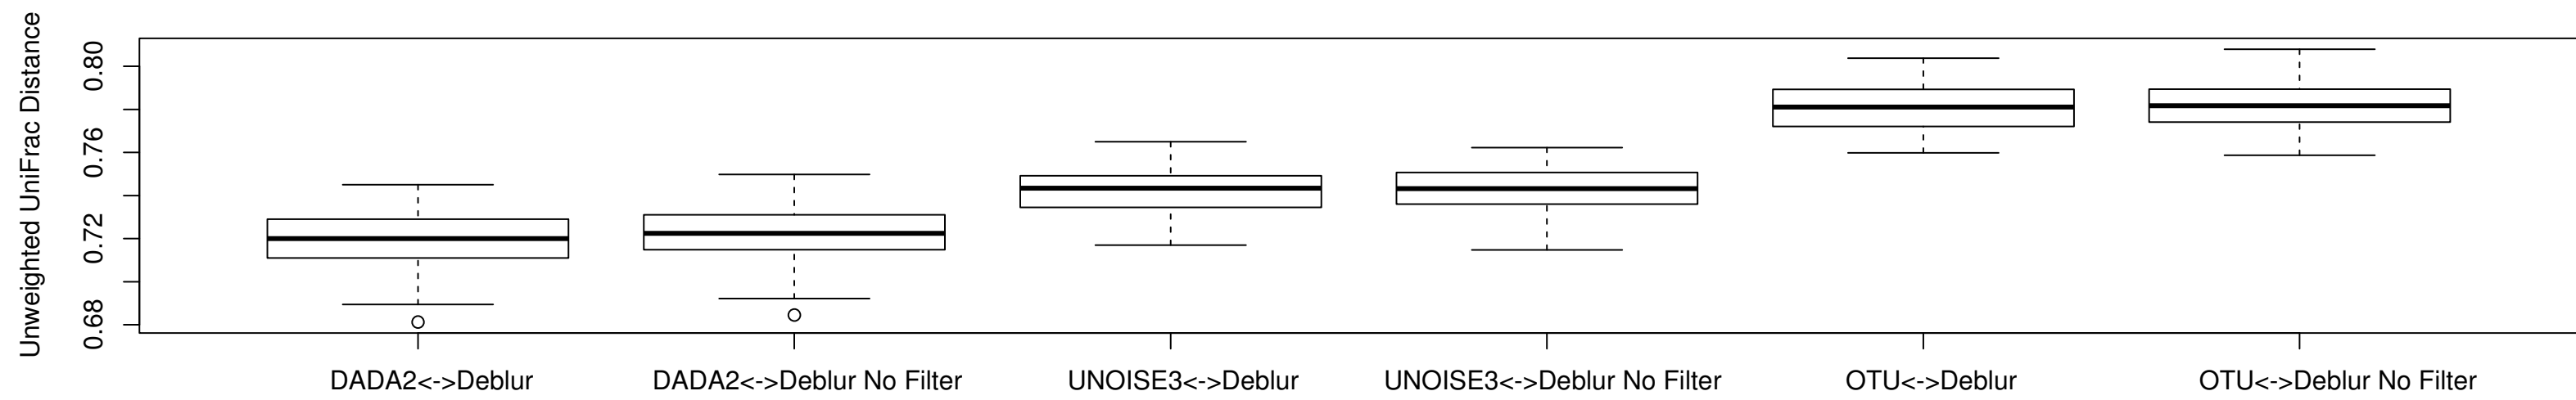**C**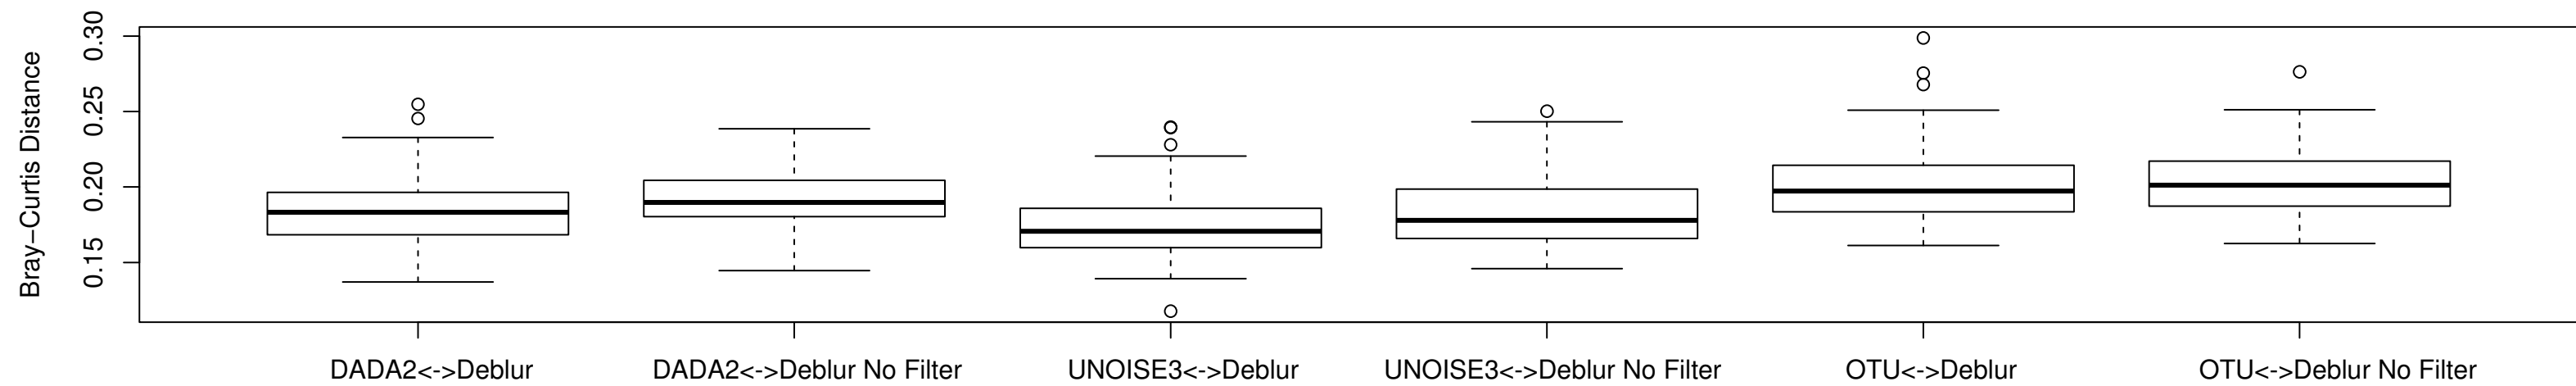

Supplemental Figure 7: Comparing Beta Diversity metrics between Deblur with and without positive filtering reveals little difference between the two based on beta diversity metrics

A) The weighted UniFrac intra-sample distances between the same biological samples based on ASVs/OTUs outputted by each sequence processing method and either Deblur or Deblur without positive filtering. B) The unweighted UniFrac intra-sample distances between the same biological samples based on ASVs/OTUs outputted by each sequence processing method and either Deblur or Deblur without positive filtering. C) The Bray-Curtis dissimilarity intra-sample distances between the same biological samples based on ASVs/OTUs outputted by each sequence processing method and either Deblur or Deblur without positive filtering
