# Supplementary material for: Denoising the Denoisers: an independent evaluation of microbiome sequence error-correction approaches
Source: PubMed Central journal article supplement (PMC6087418; doi:10.7717/peerj.5364), 2018-08-08
Supplement: peerj-06-5364-s008.pdf [file peerj-06-5364-s008.pdf]

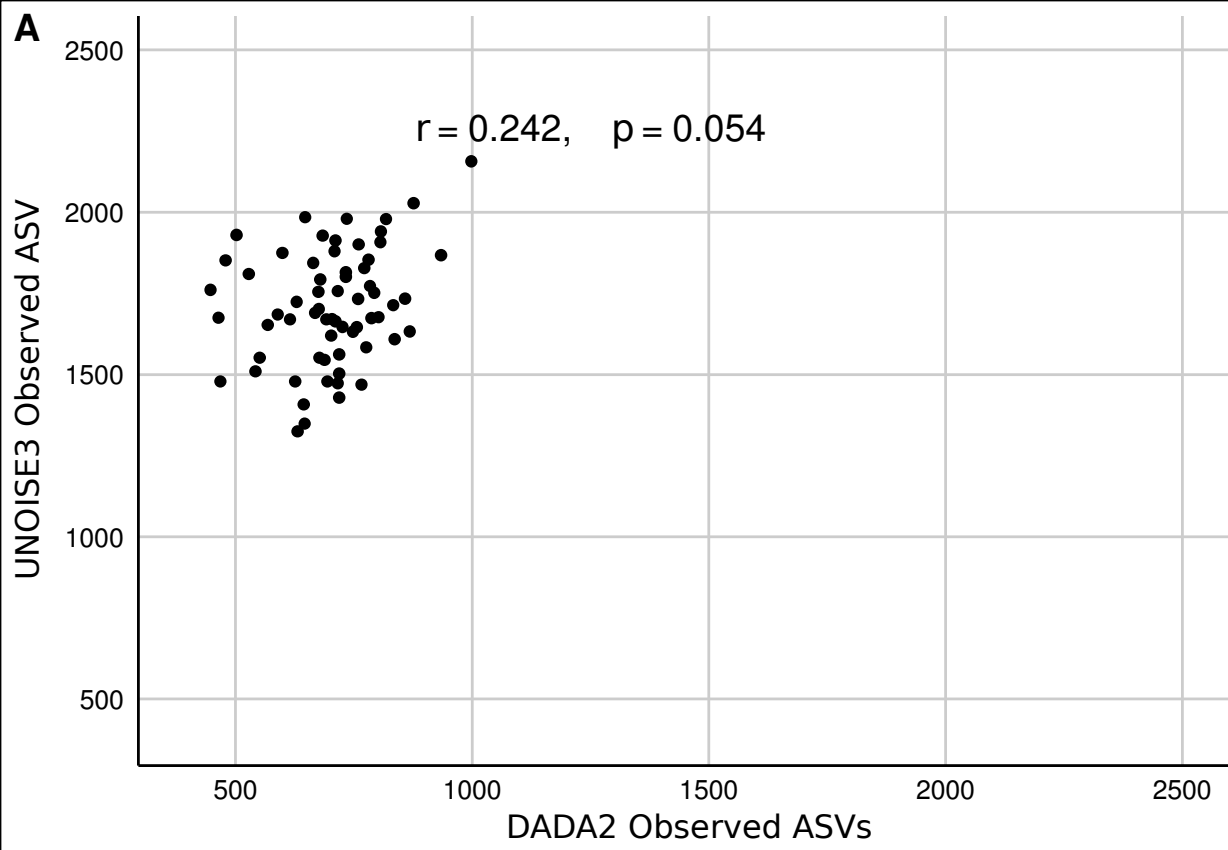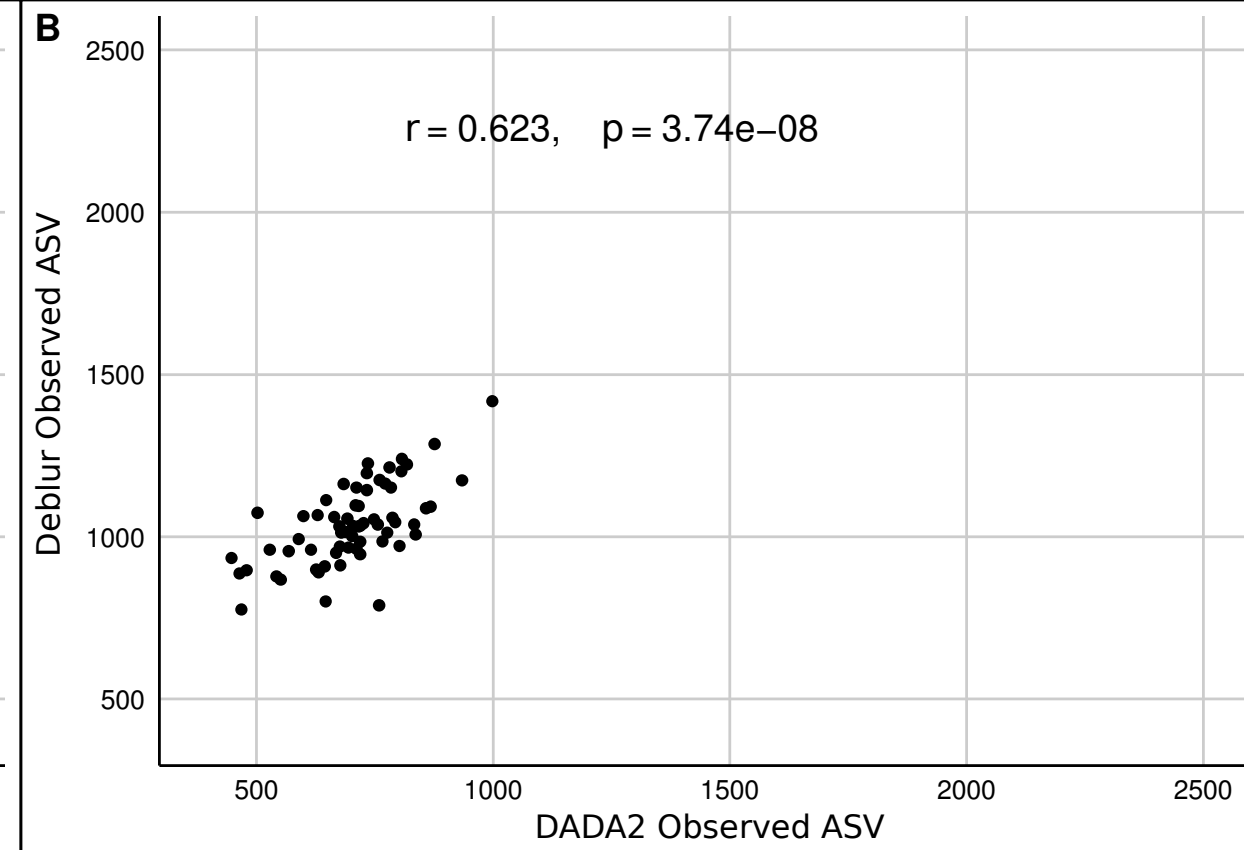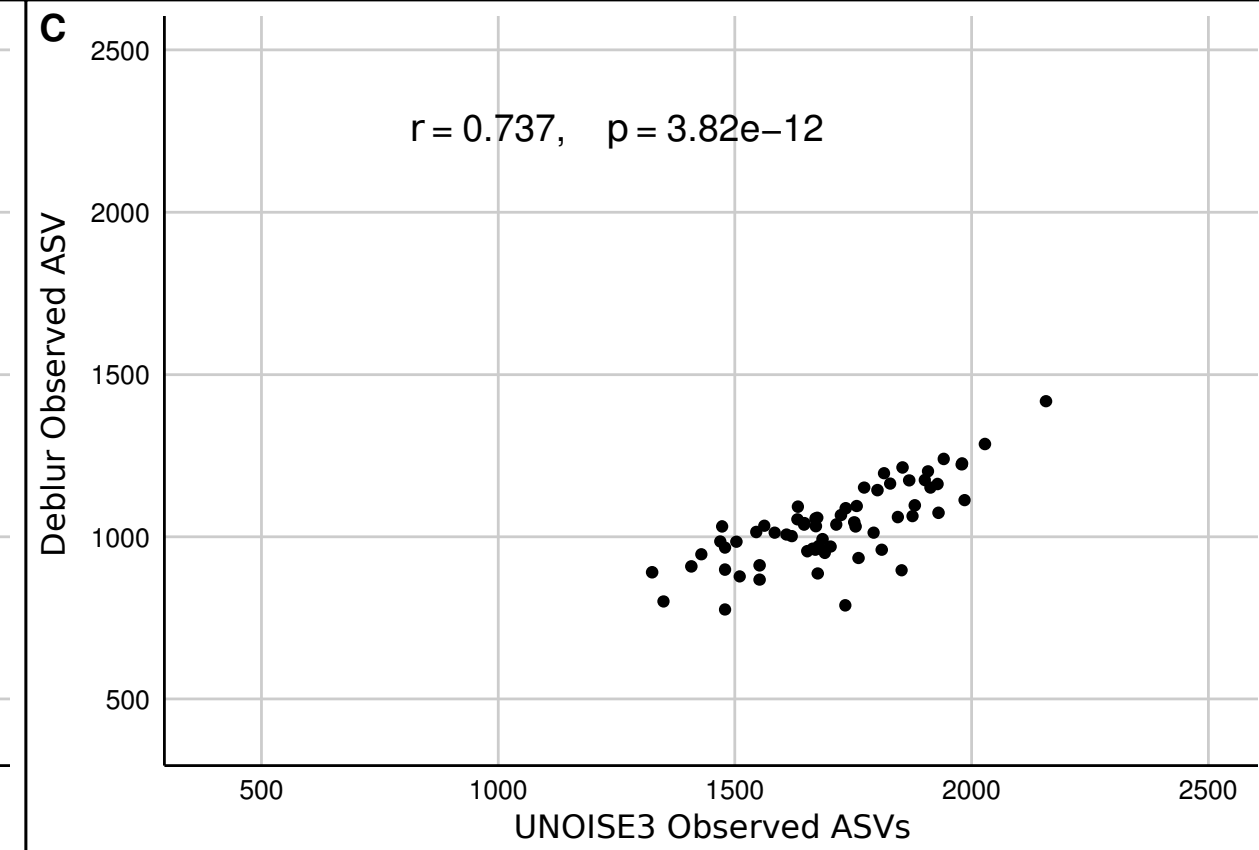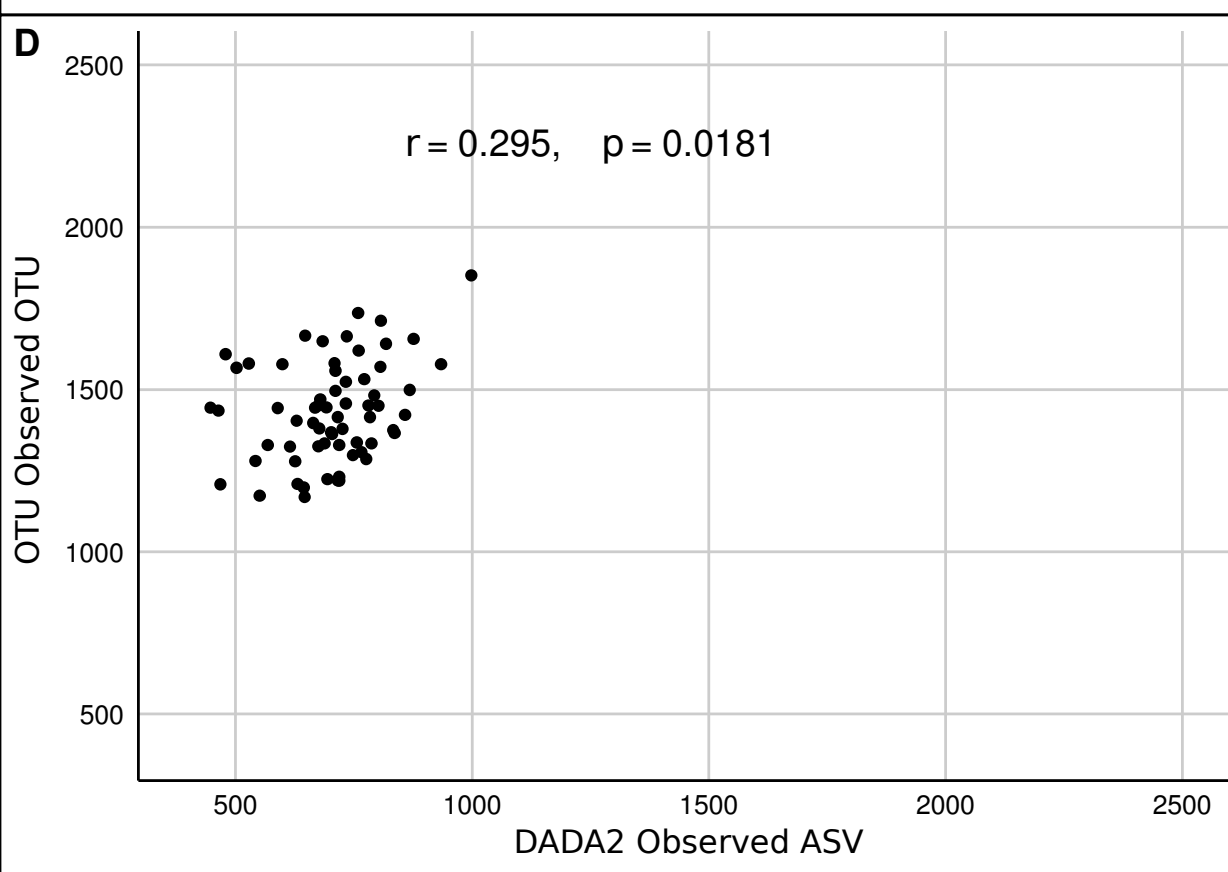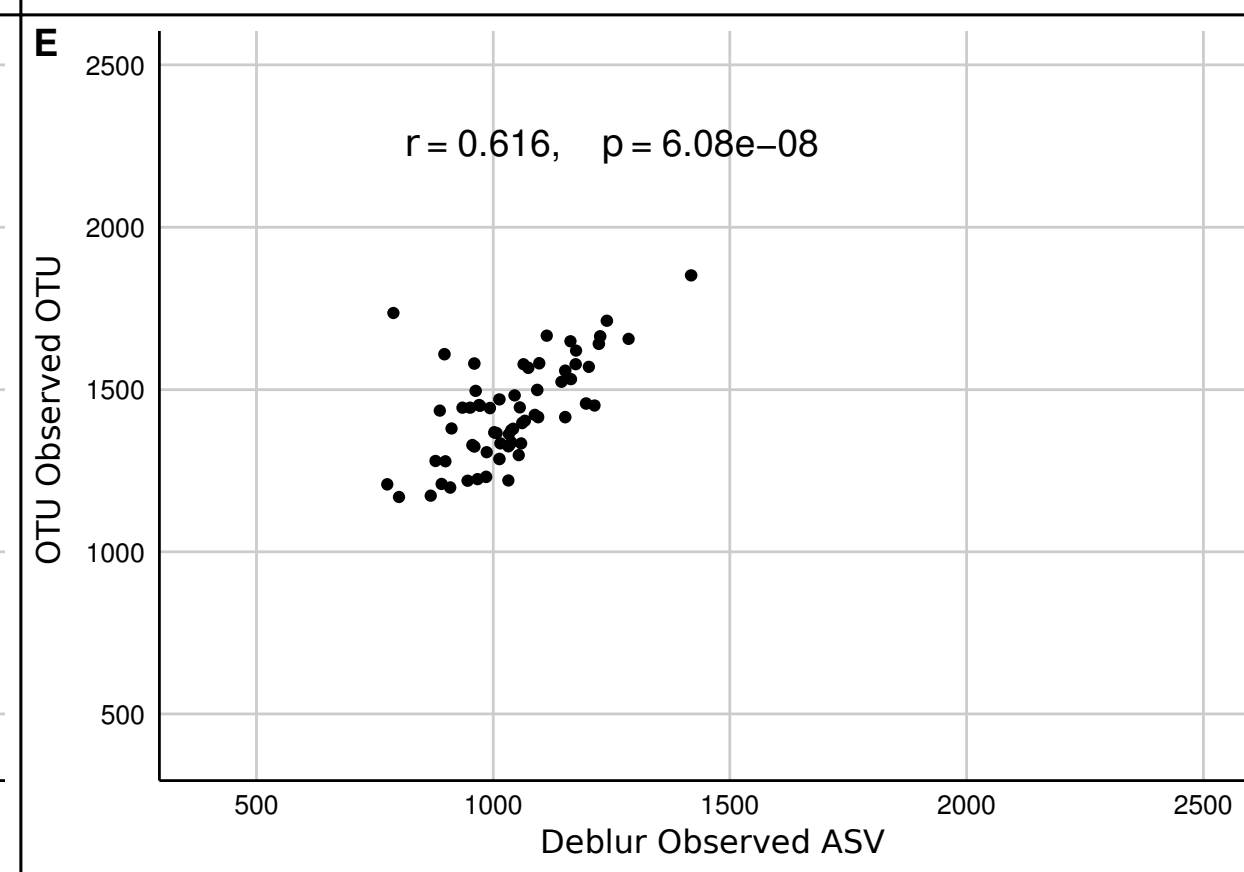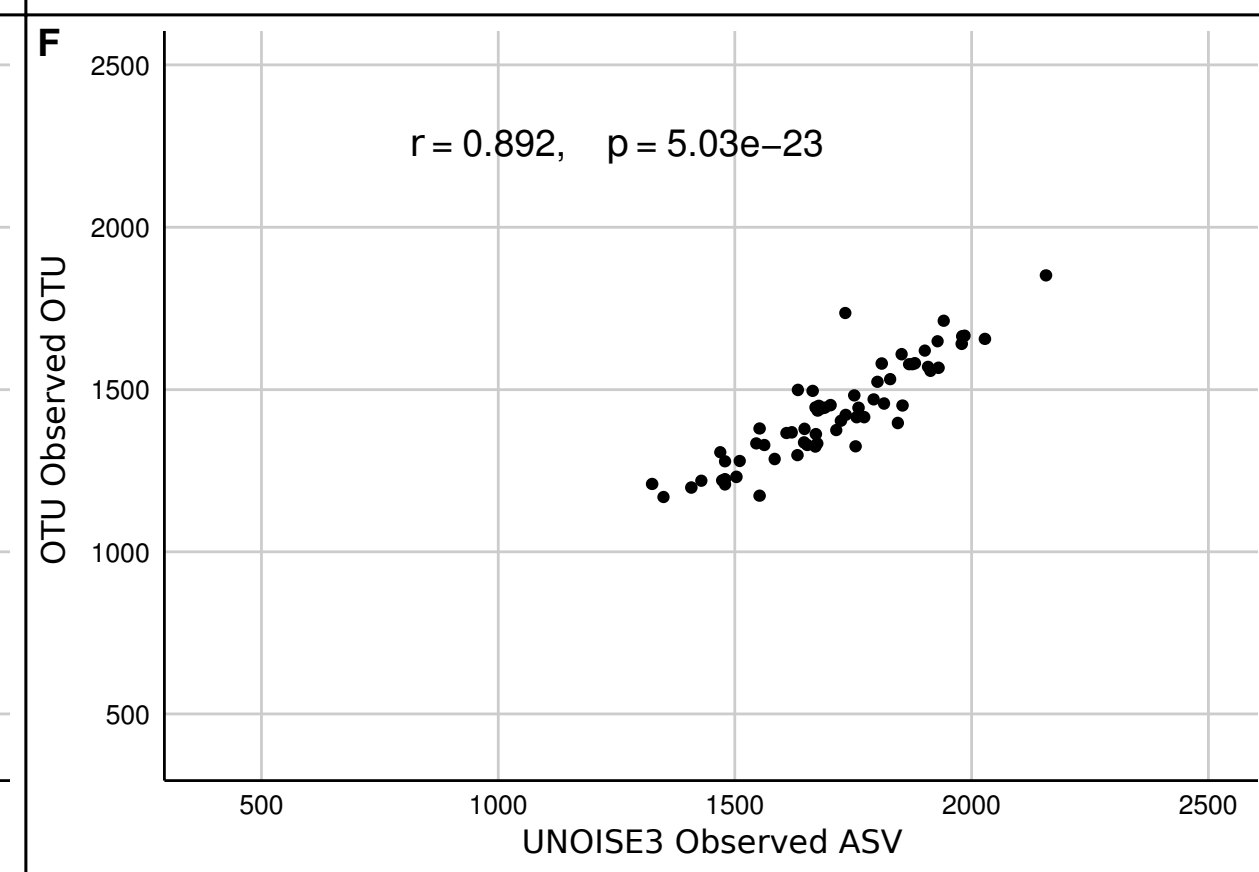

Supplemental Figure 8: Scatterplots of ASVs/OTUs found in each sample between the different sequence processing methods on the soil dataset.

Pairwise scatterplots of the number of ASVs/OTUs found in each biological sample with two different sequence processing methods on each axis. The R value represents the rho correlation between the two different processing methods.
