# Supplementary material for: Denoising the Denoisers: an independent evaluation of microbiome sequence error-correction approaches
Source: PubMed Central journal article supplement (PMC6087418; doi:10.7717/peerj.5364), 2018-08-08
Supplement: peerj-06-5364-s011.pdf [file peerj-06-5364-s011.pdf]

| Study    | Method | Filter | 100% Expected | 97% Expected | 100% Database | 97% Database | Unmatched | Total |
|----------|--------|--------|---------------|--------------|---------------|--------------|-----------|-------|
| HMP      | Dada   | High   | 25            | 5            | 0             | 1            | 12        | 43    |
| HMP      | Deblur | High   | 21            | 0            | 0             | 0            | 0         | 21    |
| HMP      | Unoise | High   | 23            | 3            | 0             | 0            | 2         | 28    |
| Mock-12  | Dada   | High   | 26            | 2            | 44            | 3            | 1         | 76    |
| Mock-12  | Deblur | High   | 16            | 1            | 11            | 1            | 0         | 29    |
| Mock-12  | Unoise | High   | 17            | 2            | 12            | 4            | 0         | 35    |
| Mock-9   | Dada   | High   | 10            | 1            | 3             | 2            | 12        | 28    |
| Mock-9   | Deblur | High   | 10            | 0            | 3             | 6            | 8         | 27    |
| Mock-9   | Unoise | High   | 10            | 0            | 3             | 9            | 16        | 38    |
| Zymomock | Dada   | High   | 8             | 3            | 0             | 0            | 0         | 11    |
| Zymomock | Deblur | High   | 8             | 0            | 0             | 0            | 1         | 9     |
| Zymomock | Unoise | High   | 8             | 11           | 0             | 3            | 5         | 27    |
| HMP      | Dada   | Med    | 25            | 7            | 0             | 0            | 10        | 42    |
| HMP      | Deblur | Med    | 21            | 0            | 0             | 1            | 0         | 22    |
| HMP      | Open   | Med    | 20            | 176          | 2             | 40           | 215       | 453   |
| HMP      | Unoise | Med    | 23            | 3            | 0             | 4            | 4         | 34    |
| Mock-12  | Dada   | Med    | 26            | 2            | 46            | 3            | 1         | 78    |
| Mock-12  | Deblur | Med    | 16            | 1            | 11            | 1            | 0         | 29    |
| Mock-12  | Open   | Med    | 19            | 815          | 72            | 1202         | 6783      | 8891  |
| Mock-12  | Unoise | Med    | 17            | 2            | 12            | 6            | 0         | 37    |
| Mock-9   | Dada   | Med    | 10            | 1            | 3             | 2            | 13        | 29    |
| Mock-9   | Deblur | Med    | 10            | 0            | 3             | 6            | 8         | 27    |
| Mock-9   | Open   | Med    | 10            | 25           | 1             | 10           | 50        | 96    |
| Mock-9   | Unoise | Med    | 10            | 0            | 3             | 9            | 16        | 38    |
| Zymomock | Dada   | Med    | 8             | 3            | 1             | 0            | 0         | 12    |
| Zymomock | Deblur | Med    | 8             | 0            | 0             | 1            | 12        | 21    |
| Zymomock | Open   | Med    | 8             | 104          | 4             | 24           | 154       | 294   |
| Zymomock | Unoise | Med    | 8             | 15           | 0             | 1            | 19        | 43    |
| HMP      | Dada   | Low    | 25            | 7            | 0             | 0            | 9         | 41    |
| HMP      | Deblur | Low    | 21            | 0            | 0             | 0            | 0         | 21    |
| HMP      | Unoise | Low    | 23            | 3            | 0             | 4            | 6         | 36    |
| Mock-12  | Dada   | Low    | 26            | 2            | 46            | 3            | 1         | 78    |
| Mock-12  | Deblur | Low    | 16            | 1            | 11            | 1            | 0         | 29    |
| Mock-12  | Unoise | Low    | 17            | 2            | 12            | 6            | 0         | 37    |
| Mock-9   | Dada   | Low    | 10            | 1            | 3             | 2            | 13        | 29    |
| Mock-9   | Deblur | Low    | 10            | 0            | 3             | 6            | 8         | 27    |
| Mock-9   | Unoise | Low    | 10            | 0            | 3             | 9            | 16        | 38    |
| Zymomock | Dada   | Low    | 8             | 3            | 1             | 0            | 0         | 12    |
| Zymomock | Deblur | Low    | 8             | 0            | 0             | 3            | 12        | 23    |
| Zymomock | Unoise | Low    | 8             | 15           | 0             | 1            | 20        | 44    |
