# Supplementary material for: Denoising the Denoisers: an independent evaluation of microbiome sequence error-correction approaches
Source: PubMed Central journal article supplement (PMC6087418; doi:10.7717/peerj.5364), 2018-08-08
Supplement: peerj-06-5364-s012.pdf [file peerj-06-5364-s012.pdf]

| Organism                                                          | DADA2 Observed Abundance | Deblur Observed Abundance | UNOISE3 Observed Abundance | OTU Observed Abundance | Expected Abundance |
|-------------------------------------------------------------------|--------------------------|---------------------------|----------------------------|------------------------|--------------------|
| <i>Acinetobacter baumannii</i> ATCC 17978                         | 3.054%                   | 3.321%                    | 2.865%                     | 3.207%                 | 5.000%             |
| <i>Actinomyces odontolyticus</i> ATCC 17982                       | 1.764%                   | 1.863%                    | 1.611%                     | 1.800%                 | 5.000%             |
| <i>Bacillus cereus</i> ATCC 10987                                 | 3.305%                   | 3.569%                    | 3.621%                     | 3.567%                 | 5.000%             |
| <i>Bacteroides vulgatus</i> ATCC 8482                             | 12.623%                  | 7.566%                    | 11.406%                    | 12.885%                | 5.000%             |
| <i>Clostridium beijerinckii</i> ATCC 51743                        | 7.926%                   | 7.656%                    | 7.246%                     | 8.031%                 | 5.000%             |
| <i>Deinococcus radiodurans</i> DSM 20539                          | 5.506%                   | 5.743%                    | 4.718%                     | 5.309%                 | 5.000%             |
| <i>Enterococcus faecalis</i> ATCC 47077                           | 2.982%                   | 3.148%                    | 3.172%                     | 3.032%                 | 5.000%             |
| <i>Escherichia coli</i> ATCC 700926                               | 5.039%                   | 5.560%                    | 4.822%                     | 5.279%                 | 5.000%             |
| <i>Helicobacter pylori</i> ATCC 700392                            | 2.867%                   | 3.169%                    | 2.613%                     | 2.946%                 | 5.000%             |
| <i>Lactobacillus gasseri</i> DSM 20243                            | 5.316%                   | 5.728%                    | 5.237%                     | 5.350%                 | 5.000%             |
| <i>Listeria monocytogenes</i> ATCC BAA-679                        | 6.821%                   | 7.265%                    | 7.231%                     | 7.115%                 | 5.000%             |
| <i>Neisseria meningitidis</i> ATCC BAA-335                        | 9.380%                   | 10.267%                   | 8.640%                     | 9.665%                 | 5.000%             |
| <i>Propionibacterium acnes</i> DSM16379                           | 2.661%                   | 2.921%                    | 2.491%                     | 2.796%                 | 5.000%             |
| <i>Pseudomonas aeruginosa</i> ATCC 47085                          | 1.530%                   | 1.200%                    | 1.358%                     | 1.500%                 | 5.000%             |
| <i>Rhodobacter sphaeroides</i> ATCC 17023                         | 3.365%                   | 3.600%                    | 3.044%                     | 0.017%                 | 5.000%             |
| <i>Streptococcus agalactiae</i> ATCC BAA-611                      | 6.078%                   | 6.552%                    | 6.410%                     | 6.422%                 | 5.000%             |
| <i>Streptococcus mutans</i> ATCC 700610                           | 8.466%                   | 9.141%                    | 8.592%                     | 8.697%                 | 5.000%             |
| <i>Streptococcus pneumoniae</i> ATCC BAA-334                      | 2.273%                   | 2.246%                    | 2.323%                     | 2.283%                 | 5.000%             |
| <i>Staphylococcus aureus</i> ATCC BAA-1718/epidermidis ATCC 12228 | 9.036%                   | 9.480%                    | 9.663%                     | 9.404%                 | 10.000%            |
| Non-Reference                                                     | 0.009%                   | 0.005%                    | 2.940%                     | 0.698%                 | 0.000%             |

Supplemental Table 2:

Observed and expected abundances for the Human Microbiome Project mock community.
