# Supplementary material for: Denoising the Denoisers: an independent evaluation of microbiome sequence error-correction approaches
Source: PubMed Central journal article supplement (PMC6087418; doi:10.7717/peerj.5364), 2018-08-08
Supplement: peerj-06-5364-s013.pdf [file peerj-06-5364-s013.pdf]

| Organism                       | DADA2 Observed Abundance | Deblur Observed Abundance | UNOISE3 Observed Abundance | OTU Observed Abundance | Expected Abundance |
|--------------------------------|--------------------------|---------------------------|----------------------------|------------------------|--------------------|
| <i>Bacillus subtilis</i>       | 8.938%                   | 9.868%                    | 9.061%                     | 8.501%                 | 18.46%             |
| <i>Enterococcus faecalis</i>   | 2.575%                   | 2.511%                    | 3.154%                     | 2.382%                 | 10.76%             |
| <i>Escherichia coli</i>        | 16.405%                  | 16.593%                   | 16.396%                    | 18.542%                | 10.98%             |
| <i>Lactobacillus fermentum</i> | 42.975%                  | 44.532%                   | 37.610%                    | 38.308%                | 15.08%             |
| <i>Listeria monocytogenes</i>  | 3.850%                   | 4.124%                    | 4.020%                     | 3.854%                 | 15.33%             |
| <i>Pseudomonas aeruginosa</i>  | 5.001%                   | 4.818%                    | 4.491%                     | 4.656%                 | 5.33%              |
| <i>Salmonella enterica</i>     | 18.054%                  | 15.549%                   | 18.302%                    | 20.606%                | 10.86%             |
| <i>Staphylococcus aureus</i>   | 2.200%                   | 1.871%                    | 2.282%                     | 1.984%                 | 13.64%             |
| Non-Reference                  | 0.002%                   | 0.134%                    | 4.683%                     | 1.167%                 | 0.000%             |

Supplemental Table 3:

Observed and expected abundances for the Zymomock mock community.
