# Supplementary material for: Denoising the Denoisers: an independent evaluation of microbiome sequence error-correction approaches
Source: PubMed Central journal article supplement (PMC6087418; doi:10.7717/peerj.5364), 2018-08-08
Supplement: peerj-06-5364-s014.pdf [file peerj-06-5364-s014.pdf]

| Organism                                       | DADA2 Observed Abundance | Deblur Observed Abundance | UNOISE3 Observed Abundance | OTU Observed Abundance | Expected Abundance |
|------------------------------------------------|--------------------------|---------------------------|----------------------------|------------------------|--------------------|
| <i>Bacteroides cellulosilyticus</i> DSM 14838. | 4.529155%                | 4.762923%                 | 4.463819%                  | 4.463819%              | 4.270000%          |
| <i>Bacteroides eggerthii</i>                   | 0.000555%                | 0.000000%                 | 0.000000%                  | 0.000576%              | 0.000427%          |
| <i>Bacteroides fragilis</i>                    | 0.030407%                | 0.000000%                 | 0.000000%                  | 0.007719%              | 0.042700%          |
| <i>Bacteroides massiliensis</i>                | 0.005105%                | 0.000000%                 | 0.000000%                  | 0.006106%              | 0.004270%          |
| <i>Bacteroides ovatus</i>                      | 46.780400%               | 52.216690%                | 46.924230%                 | 45.713600%             | 42.700000%         |
| <i>Bacteroides thetaiotaomicron</i>            | 0.045000%                | 0.000000%                 | 0.000000%                  | 0.017339%              | 0.042700%          |
| <i>Bacteroides uniformis</i>                   | 0.449948%                | 0.204068%                 | 0.451612%                  | 0.449141%              | 0.427000%          |
| <i>Bacteroides vulgatus</i>                    | 37.856410%               | 33.055450%                | 38.395760%                 | 37.320940%             | 42.700000%         |
| <i>Barnesiella intestinhominis</i>             | 0.000222%                | 0.000000%                 | 0.000000%                  | 0.000173%              | 0.000427%          |
| <i>Clostridium celatum</i> JCM 1394            | 0.040617%                | 0.039634%                 | 0.040026%                  | 0.039977%              | 0.042700%          |
| <i>Clostridium cocleatum</i>                   | 0.366716%                | 0.389210%                 | 0.364273%                  | 0.357550%              | 0.427000%          |
| <i>Clostridium methylpentusum</i> DSM 5476     | 0.000000%                | 0.000000%                 | 0.000000%                  | 0.000000%              | 0.000427%          |
| <i>Clostridium phytofermentans</i>             | 0.001276%                | 0.000000%                 | 0.000000%                  | 0.000691%              | 0.000427%          |
| <i>Clostridium xylanovorans</i>                | 3.980113%                | 4.415016%                 | 3.972042%                  | 3.963583%              | 4.270000%          |
| <i>Coprococcus comes</i> ATCC 27758            | 0.305403%                | 0.342785%                 | 0.305800%                  | 0.304900%              | 0.427000%          |
| <i>Eubacterium rectale</i> DSM 17629           | 0.003773%                | 0.003006%                 | 0.003416%                  | 0.000461%              | 0.004270%          |
| <i>Howardella ureilytica</i>                   | 0.000444%                | 0.000000%                 | 0.000000%                  | 0.000461%              | 0.000427%          |
| <i>Parabacteroides distasonis</i> JCM 13400    | 2.253178%                | 2.067511%                 | 2.247355%                  | 4.124471%              | 0.000427%          |
| <i>Parabacteroides distasonis</i> JCM 13401    | 2.007813%                | 1.716153%                 | 1.982890%                  | 0.054839%              | 4.270000%          |
| <i>Parabacteroides merdae</i>                  | 0.518253%                | 0.582590%                 | 0.511565%                  | 0.509223%              | 0.427000%          |
| <i>Parabacteroides</i> sp. D13                 | 0.000000%                | 0.000000%                 | 0.000000%                  | 0.000288%              | 0.000427%          |
| <i>Paraprevotella clara</i> YIT 11840          | 0.004439%                | 0.003897%                 | 0.004327%                  | 0.004378%              | 0.004270%          |
| <i>Prevotella buccalis</i>                     | 0.000000%                | 0.000000%                 | 0.000000%                  | 0.000346%              | 0.000427%          |
| <i>Prevotella copri</i> DSM 18205              | 0.000832%                | 0.000000%                 | 0.000000%                  | 0.000518%              | 0.000427%          |
| <i>Roseburia intestinalis</i> L1-82            | 0.004605%                | 0.003563%                 | 0.004384%                  | 0.007028%              | 0.004270%          |
| <i>Roseburia inulinivorans</i> DSM 16841       | 0.036788%                | 0.044309%                 | 0.036609%                  | 0.036867%              | 0.042700%          |
| <i>Ruminococcus gnavus</i> ATCC 29149          | 0.001665%                | 0.000000%                 | 0.000000%                  | 0.000576%              | 0.000427%          |
| Non-Reference                                  | 0.300891%                | 0.153190%                 | 0.226546%                  | 2.614085%              | 0.000000%          |
