# Supplementary material for: Denoising the Denoisers: an independent evaluation of microbiome sequence error-correction approaches
Source: PubMed Central journal article supplement (PMC6087418; doi:10.7717/peerj.5364), 2018-08-08
Supplement: peerj-06-5364-s015.pdf [file peerj-06-5364-s015.pdf]

| Organism                                       | DADA2 Observed Abundance | Deblur Observed Abundance | UNOISE3 Observed Abundance | OTU Observed Abundance | Expected Abundance |
|------------------------------------------------|--------------------------|---------------------------|----------------------------|------------------------|--------------------|
| <i>Cyberlindnera jadinii</i>                   | 2.246%                   | 2.010%                    | 2.039%                     | 2.039%                 | 6.250%             |
| <i>Debaryomyces hansenii</i>                   | 8.005%                   | 7.929%                    | 7.264%                     | 7.024%                 | 6.250%             |
| <i>Diutina catenulata (Candida catenulata)</i> | 17.785%                  | 17.906%                   | 16.067%                    | 16.053%                | 6.250%             |
| <i>Fusarium domesticum</i>                     | 11.347%                  | 10.684%                   | 10.285%                    | 10.262%                | 6.250%             |
| <i>Galactomyces geotrichum</i> Type 1          | 5.047%                   | 4.458%                    | 5.490%                     | 4.918%                 | 6.250%             |
| <i>Galactomyces geotrichum</i> Type 2          | 2.413%                   | 1.558%                    | 2.097%                     | 2.851%                 | 6.250%             |
| <i>Galactomyces geotrichum</i> Type 3          | 1.290%                   | 5.687%                    | 6.525%                     | 11.381%                | 6.250%             |
| <i>Galactomyces geotrichum</i> Type 4          | 5.898%                   | 4.378%                    | 5.342%                     | 1.419%                 | 6.250%             |
| <i>Hyphopichia burtonii</i>                    | 6.516%                   | 6.554%                    | 5.918%                     | 5.915%                 | 6.250%             |
| <i>Kluyveromyces lactis</i>                    | 6.814%                   | 6.853%                    | 6.191%                     | 6.186%                 | 6.250%             |
| <i>Penicillium allii</i>                       | 0.000%                   | 0.000%                    | 0.000%                     | 0.004%                 | 6.250%             |
| <i>Penicillium commune</i>                     | 0.000%                   | 0.000%                    | 0.000%                     | 0.000%                 | 6.250%             |
| <i>Penicillium roqueforti</i>                  | 7.463%                   | 7.493%                    | 6.774%                     | 6.755%                 | 6.250%             |
| <i>Pichia Kudriavzevii</i>                     | 11.932%                  | 11.746%                   | 10.832%                    | 10.814%                | 6.250%             |
| <i>Scopulariopsis fusca</i>                    | 1.373%                   | 1.363%                    | 1.246%                     | 1.245%                 | 6.250%             |
| <i>Zygosaccharomyces rouxii</i>                | 1.714%                   | 1.611%                    | 1.557%                     | 1.555%                 | 6.250%             |
| Non-Reference                                  | 10.133%                  | 9.747%                    | 12.350%                    | 11.557%                | 0.000%             |

Supplemental Table 5:

Observed and expected abundances for the fungal ITS1 mock community.
