# Supplementary material for: Denoising the Denoisers: an independent evaluation of microbiome sequence error-correction approaches
Source: PubMed Central journal article supplement (PMC6087418; doi:10.7717/peerj.5364), 2018-08-08
Supplement: peerj-06-5364-s016.pdf [file peerj-06-5364-s016.pdf]

| Method  | Weighted |         |        | Unweighted |         |        | Bray-Curtis |         |        |
|---------|----------|---------|--------|------------|---------|--------|-------------|---------|--------|
|         | DADA2    | UNOISE3 | Deblur | DADA2      | UNOISE3 | Deblur | DADA2       | UNOISE3 | Deblur |
| DADA2   | X        | X       | X      | X          | X       | X      | X           | X       | X      |
| UNOISE3 | 0.904    | X       | X      | 0.719      | X       | X      | 0.974       | X       | X      |
| Deblur  | 0.925    | 0.856   | X      | 0.772      | 0.835   | X      | 0.962       | 0.959   | X      |
| OTU     | 0.927    | 0.857   | 0.958  | 0.544      | 0.587   | 0.636  | 0.983       | 0.984   | 0.956  |

Supplemental Table 6:

Mantel correlations between distance matrices generated by each method for the Exercise real dataset.
