# Supplementary material for: Denoising the Denoisers: an independent evaluation of microbiome sequence error-correction approaches
Source: PubMed Central journal article supplement (PMC6087418; doi:10.7717/peerj.5364), 2018-08-08
Supplement: peerj-06-5364-s017.pdf [file peerj-06-5364-s017.pdf]

| Method  | Weighted |         |        | Unweighted |         |        | Bray-Curtis |         |        |
|---------|----------|---------|--------|------------|---------|--------|-------------|---------|--------|
|         | DADA2    | UNOISE3 | Deblur | DADA2      | UNOISE3 | Deblur | DADA2       | UNOISE3 | Deblur |
| DADA2   | X        | X       | X      | X          | X       | X      | X           | X       | X      |
| UNOISE3 | 0.825    | X       | X      | 0.663      | X       | X      | 0.995       | X       | X      |
| Deblur  | 0.962    | 0.806   | X      | 0.699      | 0.635   | X      | 0.986       | 0.982   | X      |
| OTU     | 0.800    | 0.925   | 0.764  | 0.523      | 0.638   | 0.590  | 0.982       | 0.985   | 0.971  |

Supplemental Table 7:

Mantel correlations between distance matrices generated by each method for the human associated real dataset.
