# Supplementary material for: Denoising the Denoisers: an independent evaluation of microbiome sequence error-correction approaches
Source: PubMed Central journal article supplement (PMC6087418; doi:10.7717/peerj.5364), 2018-08-08
Supplement: peerj-06-5364-s018.pdf [file peerj-06-5364-s018.pdf]

| Method  | Weighted |         |        | Unweighted |         |        | Bray-Curtis |         |        |
|---------|----------|---------|--------|------------|---------|--------|-------------|---------|--------|
|         | DADA2    | UNOISE3 | Deblur | DADA2      | UNOISE3 | Deblur | DADA2       | UNOISE3 | Deblur |
| DADA2   | X        | X       | X      | X          | X       | X      | X           | X       | X      |
| UNOISE3 | 0.970    | X       | X      | 0.881      | X       | X      | 0.979       | X       | X      |
| Deblur  | 0.974    | 0.976   | X      | 0.917      | 0.955   | X      | 0.975       | 0.974   | X      |
| OTU     | 0.975    | 0.972   | 0.969  | 0.863      | 0.893   | 0.883  | 0.974       | 0.988   | 0.968  |

Supplemental Table 8:

Mantel correlations between distance matrices generated by each method for the soil real dataset.
